# Supplementary material for: Novel Potent and Selective Inhibitors of p90 Ribosomal S6 Kinase Reveal the Heterogeneity of RSK Function in MAPK-Driven Cancers
Source: Oxford University Press journal article supplement (doi:10.1158/1541-7786.mcr-13-0595), 2014-02-20
Supplement: 15417786mcr130595-sup-tab1.xlsx [file 15417786mcr130595-sup-tab1.xlsx]

## Sheet: TableS1
Table S1. Competition binding of the indicated compounds at 10 mM concentration with an immobilized, active-site directed ligand in each of the following kinases. Results are reported as 100 minus % Control, so that larger numbers indicate stronger hits.
ASSAY_NAME	LJH685	LJI308	BI-D1870-AE	FMK-PA
RSK2(Kin.Dom.1-N-terminal) Kin.Dom.1-N-terminal	99.95	100	99.9	0
RSK1(Kin.Dom.1-N-terminal) Kin.Dom.1-N-terminal		100		0
RSK3(Kin.Dom.1-N-terminal) Kin.Dom.1-N-terminal		99.95		0
RSK4(Kin.Dom.1-N-terminal) Kin.Dom.1-N-terminal		100		28
RSK1(Kin.Dom.2-C-terminal) Kin.Dom.2-C-terminal		47		68
RSK3(Kin.Dom.2-C-terminal) Kin.Dom.2-C-terminal		29		48
RSK4(Kin.Dom.2-C-terminal) Kin.Dom.2-C-terminal		40		94.9
ABL1(E255K)-phosphorylated	0	5	31	40
ABL1(T315I)-phosphorylated	34	16	86	0
ABL1-phosphorylated	5	0	25	67
ACVR1B	40	0	11	64
ADCK3	5	0	9	25
AKT1	0	9	0	0
AKT2	17	3	0	0
ALK	62	18	73	0
AURKA	12	0	42	0
AURKB	52	38	99.15	0
AXL	76	73	95.6	5
BMPR2	21	84	100	61
BRAF	14	63	12	43
BRAF(V600E)	70	68	8	49
BTK	0	10	0	33
CDK11	19	28	0	93.1
CDK2	12	11	96.4	0
CDK3	0	7	49	0
CDK7	21	19	86	46
CDK9	10	5	46	3
CHEK1	0	0	0	0
CSF1R	54	36	94.2	63
CSNK1D	92.6	67	97.6	44
CSNK1G2	15	9	97.4	18
DCAMKL1	25	13	17	0
DYRK1B	27	82	91.8	13
EGFR	37	11	26	19
EGFR(L858R)	0	10	72	42
EPHA2	0	5	10	73
ERBB2	0	14	0	48
ERBB4	0	14	0	20
Erk1	0	0	0	18
FAK	0	0	70	0
FGFR2	0	5	4	40
FGFR3	3	4	28	12
FLT3	39	74	95.6	83
GSK3B	0	0	56	0
IGF1R	0	0	27	4
IKK-alpha	0	0	5	38
IKK-beta	64	37	11	17
INSR	0	0	54	18
JAK2(JH1domain-catalytic)	24	71	78	24
JAK3(JH1domain-catalytic)	5	32	94.4	0
JNK1	0	50	42	0
JNK2	0	0	36	24
JNK3	7	31	51	19
KIT	27	20	96.4	93.8
KIT(D816V)	1	32	36	68
KIT(V559D,T670I)	47	19	94.1	32
LKB1	0	0	46	0
MAP3K4	0	0	94.3	0
MAPKAPK2	0	0	0	1
MARK3	13	12	0	7
MEK1	22	18	82	52
MEK2	7	27	84	51
MET	0	15	96.2	0
MKNK1	51	62	0	30
MKNK2	87	69	57	90.4
MLK1	0	19	81	12
p38-alpha	2	0	0	31
p38-beta	26	0	0	43
PAK1	0	0	31	22
PAK2	4	22	51	23
PAK4	6	0	41	0
PCTK1	11	24	97	0
PDGFRA	0	8	59	58
PDGFRB	38	21	94.5	69
PDPK1	5	7	29	3
PIK3C2B	0	34	45	0
PIK3CA	2	30	0	1
PIK3CG	69	58	99.6	43
PIM1	30	17	78	6
PIM2	28	0	0	14
PIM3	31	22	80	4
PKAC-alpha	80	81	31	1
PLK1	0	0	99.95	29
PLK3	12	0	99.9	7
PLK4	42	59	25	11
PRKCE	78	1	36	0
RAF1	10	14	5	20
RET	37	42	87	86
RIOK2	33	26	30	28
ROCK2	86	72	66	21
SNARK	17	8	72	6
SRC	0	0	19	90
SRPK3	0	14	72	4
TGFBR1	0	0	42	30
TIE2	60	80	78	35
TRKA	1	51	78	21
TSSK1B	21	4	0	0
TYK2(JH1domain-catalytic)	52	51	93	0
ULK2	17	19	99.1	0
VEGFR2	20	30	71	23
YANK3	20	2	0	46
ZAP70	3	34	30	6
AAK1		0		0
ABL1(F317I)-nonphosphorylated		10		11
ABL1(F317I)-phosphorylated		11		31
ABL1(F317L)-nonphosphorylated		0		57
ABL1(F317L)-phosphorylated		21		52
ABL1(H396P)-nonphosphorylated		19		85
ABL1(H396P)-phosphorylated		0		65
ABL1(M351T)-phosphorylated		0		7
ABL1(Q252H)-nonphosphorylated		17		18
ABL1(Q252H)-phosphorylated		0		48
ABL1(T315I)-nonphosphorylated		0		32
ABL1(Y253F)-phosphorylated		0		64
ABL1-nonphosphorylated		5		39
ABL2		0		38
ACVR1		0		72
ACVR2A		0		33
ACVR2B		0		25
ACVRL1		0		76
ADCK4		0		42
AKT3		17		0
AMPK-alpha1		6		0
AMPK-alpha2		11		0
ANKK1		23		13
ARK5		0		0
ASK1		4		0
ASK2		2		5
ATAK		75		22
AURKC		32		21
BIKE		9		0
BLK		31		67
BMPR1A		0		25
BMPR1B		31		95.9
BMX		4		44
BRK		0		67
BRSK1		27		55
BRSK2		0		27
CAMK1		36		0
CAMK1D		60		2
CAMK1G		12		8
CAMK2A		62		21
CAMK2B		51		0
CAMK2D		41		5
CAMK2G		24		0
CAMK4		20		0
CAMKK1		0		0
CAMKK2		0		0
CASK		5		0
CDC2L1		0		4
CDC2L2		0		0
CDC2L5		0		11
CDK4-cyclinD1		33		0
CDK4-cyclinD3		1		4
CDK5		13		0
CDK8		15		73
CDKL1		0		15
CDKL2		0		20
CDKL3		0		0
CDKL5		10		0
CHEK2		0		0
CIT		13		0
CLK1		52		0
CLK2		62		0
CLK3		90.1		0
CLK4		49		15
CSK		13		21
CSNK1A1		54		9
CSNK1A1L		0		0
CSNK1E		93		54
CSNK1G1		0		0
CSNK1G3		0		0
CSNK2A1		0		2
CSNK2A2		52		22
CTK		8		31
DAPK1		91.2		20
DAPK2		84		0
DAPK3		86		0
DCAMKL2		0		7
DCAMKL3		12		23
DDR1		19		75
DDR2		0		6
DLK		10		5
DMPK		0		0
DMPK2		10		41
DRAK1		0		12
DRAK2		31		18
DYRK1A		91.1		3
DYRK2		71		16
EGFR(E746-A750del)		9		27
EGFR(G719C)		0		35
EGFR(G719S)		0		0
EGFR(L747-E749del, A750P)		17		30
EGFR(L747-S752del, P753S)		9		41
EGFR(L747-T751del,Sins)		11		47
EGFR(L858R,T790M)		18		15
EGFR(L861Q)		19		31
EGFR(S752-I759del)		0		36
EGFR(T790M)		19		2
EIF2AK1		2		19
EPHA1		0		87
EPHA3		25		57
EPHA4		10		56
EPHA5		1		55
EPHA6		37		88
EPHA7		18		0
EPHA8		13		86
EPHB1		0		69
EPHB2		15		54
EPHB3		8		81
EPHB4		0		74
EPHB6		16		74
ERBB3		0		49
Erk2		0		0
ERK3		0		0
ERK4		0		0
ERK5		0		0
ERK8		0		0
ERN1		27		0
FER		0		0
FES		0		0
FGFR1		12		21
FGFR3(G697C)		8		15
FGFR4		13		0
FGR		0		79
FLT1		70		26
FLT3(D835H)		68		71
FLT3(D835Y)		70		63
FLT3(ITD)		50		44
FLT3(K663Q)		74		89
FLT3(N841I)		88		65
FLT3(R834Q)		49		46
FLT4		59		19
FRK		0		71
FYN		0		62
GAK		21		35
GCN2(Kin.Dom.2,S808G) Kin.Dom.2		45		0
GRK1		5		0
GRK4		4		0
GRK7		32		0
GSK3A		0		0
HCK		3		64
HIPK1		99.45		23
HIPK2		99.6		27
HIPK3		99.75		3
HIPK4		93.8		0
HPK1		16		0
HUNK		19		12
ICK		0		0
IKK-epsilon		52		10
INSRR		10		0
IRAK1		85		0
IRAK3		93.2		48
IRAK4		29		3
ITK		0		0
JAK1(JH1domain-catalytic)		1		0
JAK1(JH2domain-pseudokinase)		0		18
KIT(A829P)		0		42
KIT(D816H)		26		43
KIT(L576P)		36		94.2
KIT(V559D)		25		96.6
KIT(V559D,V654A)		19		13
LATS1		0		0
LATS2		40		0
LCK		9		93.2
LIMK1		36		6
LIMK2		0		27
LOK		95.9		25
LRRK2		23		15
LRRK2(G2019S)		3		26
LTK		5		0
LYN		9		51
LZK		5		0
MAK		0		0
MAP3K1		0		56
MAP3K15		0		0
MAP3K2		55		41
MAP3K3		88		36
MAP4K2		4		30
MAP4K3		9		6
MAP4K4		2		0
MAP4K5		0		13
MAPKAPK5		0		3
MARK1		0		0
MARK2		10		12
MARK4		0		0
MAST1		5		1
MEK3		77		4
MEK4		99.05		59
MEK5		15		98.7
MEK6		12		20
MERTK		46		0
MET(M1250T)		0		0
MET(Y1235D)		0		0
MINK		30		11
MKK7		36		0
MLCK		0		0
MLK2		16		4
MLK3		0		0
MRCKA		19		23
MRCKB		0		4
MST1		16		0
MST1R		14		0
MST2		51		0
MST3		17		6
MST4		4		10
MTOR		0		14
MUSK		5		4
MYLK		8		0
MYLK2		0		11
MYLK4		0		0
MYO3A		0		0
MYO3B		0		0
NDR1		0		4
NDR2		0		0
NEK1		0		33
NEK11		0		55
NEK2		10		27
NEK3		0		0
NEK4		4		44
NEK5		18		0
NEK6		22		0
NEK7		0		0
NEK9		35		0
NIM1		16		0
NLK		0		60
OSR1		22		0
p38-delta		6		0
p38-gamma		24		0
PAK3		11		0
PAK6		18		9
PAK7		17		18
PCTK2		29		0
PCTK3		26		3
PFCDPK1(P.falciparum) Plasmodium falciparum 3D7		0		81
PFPK5(P.falciparum) Plasmodium falciparum 3D7		0		4
PFTAIRE2		0		0
PFTK1		0		0
PHKG1		0		0
PHKG2		4		0
PIK3C2G		0		0
PIK3CA(C420R)		5		0
PIK3CA(E542K)		13		0
PIK3CA(E545A)		36		0
PIK3CA(E545K)		0		0
PIK3CA(H1047L)		6		13
PIK3CA(H1047Y)		33		2
PIK3CA(I800L)		40		0
PIK3CA(M1043I)		32		0
PIK3CA(Q546K)		0		6
PIK3CB		25		40
PIK3CD		22		15
PIK4CB		32		0
PIP5K1A		0		10
PIP5K1C		41		31
PIP5K2B		17		0
PIP5K2C		95.4		89
PKAC-beta		76		3
PKMYT1		9		7
PKN1		27		15
PKN2		32		8
PKNB(M.tuberculosis) Mycobacterium tuberculosis H37Rv		33		38
PLK2		0		10
PRKCD		12		1
PRKCH		5		4
PRKCI		25		27
PRKCQ		48		14
PRKD1		0		0
PRKD2		5		0
PRKD3		4		0
PRKG1		47		0
PRKG2		46		5
PRKR		1		12
PRKX		48		0
PRP4		13		0
PYK2		3		0
QSK		0		67
RET(M918T)		51		94.6
RET(V804L)		17		0
RET(V804M)		6		0
RIOK1		24		15
RIOK3		4		0
RIPK1		0		0
RIPK2		0		95.6
RIPK4		26		0
RIPK5		21		32
ROCK1		66		18
ROS1		0		8
RPS6KA4(Kin.Dom.1-N-terminal) Kin.Dom.1-N-terminal		97.3		0
RPS6KA4(Kin.Dom.2-C-terminal) Kin.Dom.2-C-terminal		5		56
RPS6KA5(Kin.Dom.1-N-terminal) Kin.Dom.1-N-terminal		67		0
RPS6KA5(Kin.Dom.2-C-terminal) Kin.Dom.2-C-terminal		0		0
S6K1		99.55		47
SBK1		10		0
SgK110		0		1
SGK3		63		0
SIK		10		34
SIK2		0		66
SLK		76		31
SNRK		33		0
SRMS		0		0
SRPK1		0		0
SRPK2		0		0
STK16		68		39
STK33		59		7
STK35		11		0
STK36		6		0
STK39		0		8
SYK		0		5
TAK1		15		18
TAOK1		29		16
TAOK2		10		25
TAOK3		0		13
TBK1		14		0
TEC		0		0
TESK1		0		0
TGFBR2		35		0
TIE1		64		18
TLK1		2		0
TLK2		0		0
TNIK		25		6
TNK1		23		0
TNK2		0		25
TNNI3K		14		78
TRKB		65		24
TRKC		85		0
TRPM6		24		19
TTK		16		2
TXK		24		84
TYK2(JH2domain-pseudokinase)		0		0
TYRO3		0		0
ULK1		55		10
ULK3		34		0
VRK2		1		0
WEE1		18		0
WEE2		36		0
YANK1		12		86
YANK2		9		68
YES		0		84
YSK1		0		11
YSK4		56		50
ZAK		26		4
